# Supplementary material for: IL-8 is a novel prometastatic chemokine in intrahepatic cholangiocarcinoma that induces CXCR2-PI3K/AKT signaling upon CD97 activation
Source: Springer Nature journal article supplement (doi:10.1038/s41598-023-45496-3), 2023-10-31
Supplement: MOESM1 [file 41598_2023_45496_MOESM1_ESM.pdf]

# Supplementary Figure 1

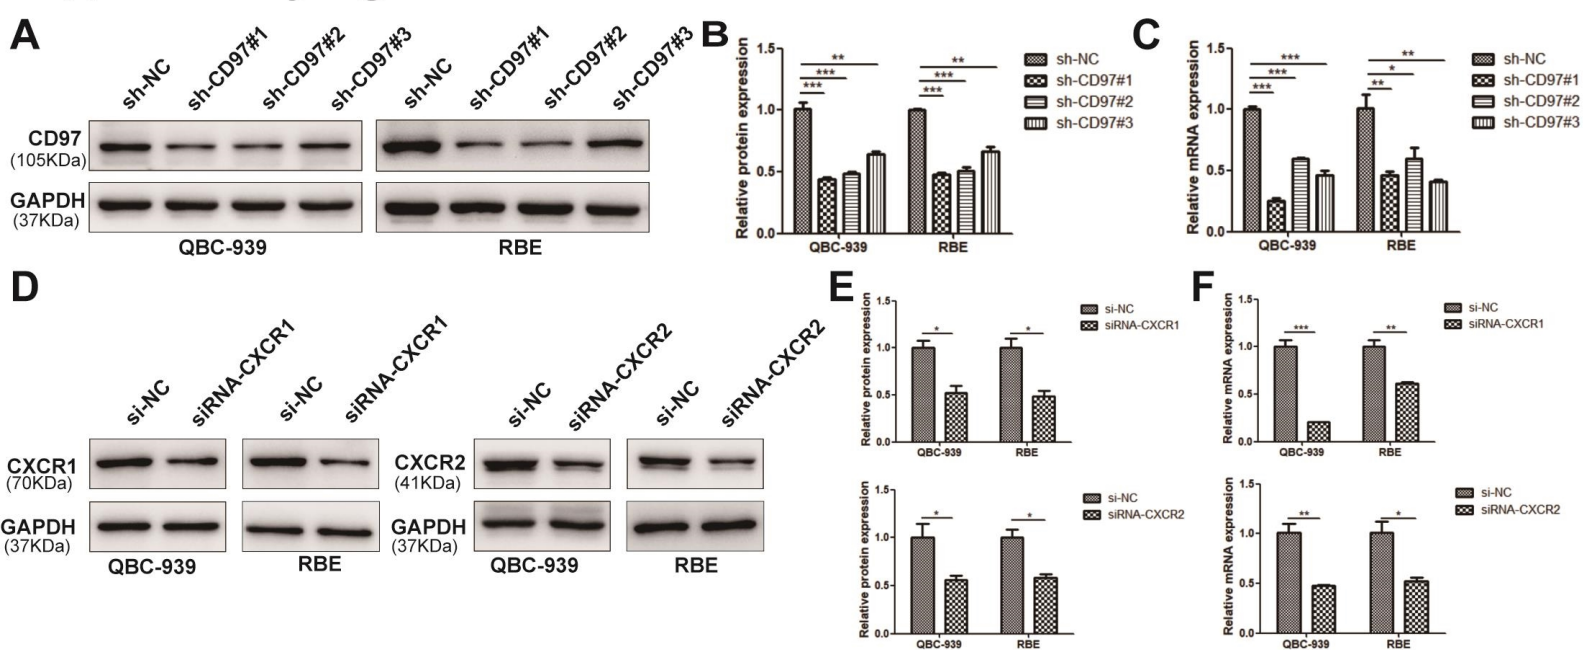

Supplementary Figure.1 The silencing efficiency of constructs targeting CD97, CXCR1 and CXCR2 was evaluated in QBC-939 cells and RBE cells. The silencing efficiency of constructs targeting CD97 was confirmed by western blotting (A, B) and qRT-PCR (C). The silencing efficiency of constructs targeting CXCR1 and CXCR2 was evaluated by WB (D, E) and qRT-PCR (F). \* $p < 0.05$ , \*\* $p < 0.01$ , \*\*\* $p < 0.001$ . sh, short hairpin; si, small interfering; NC, negative control.

supplementary Fig 2

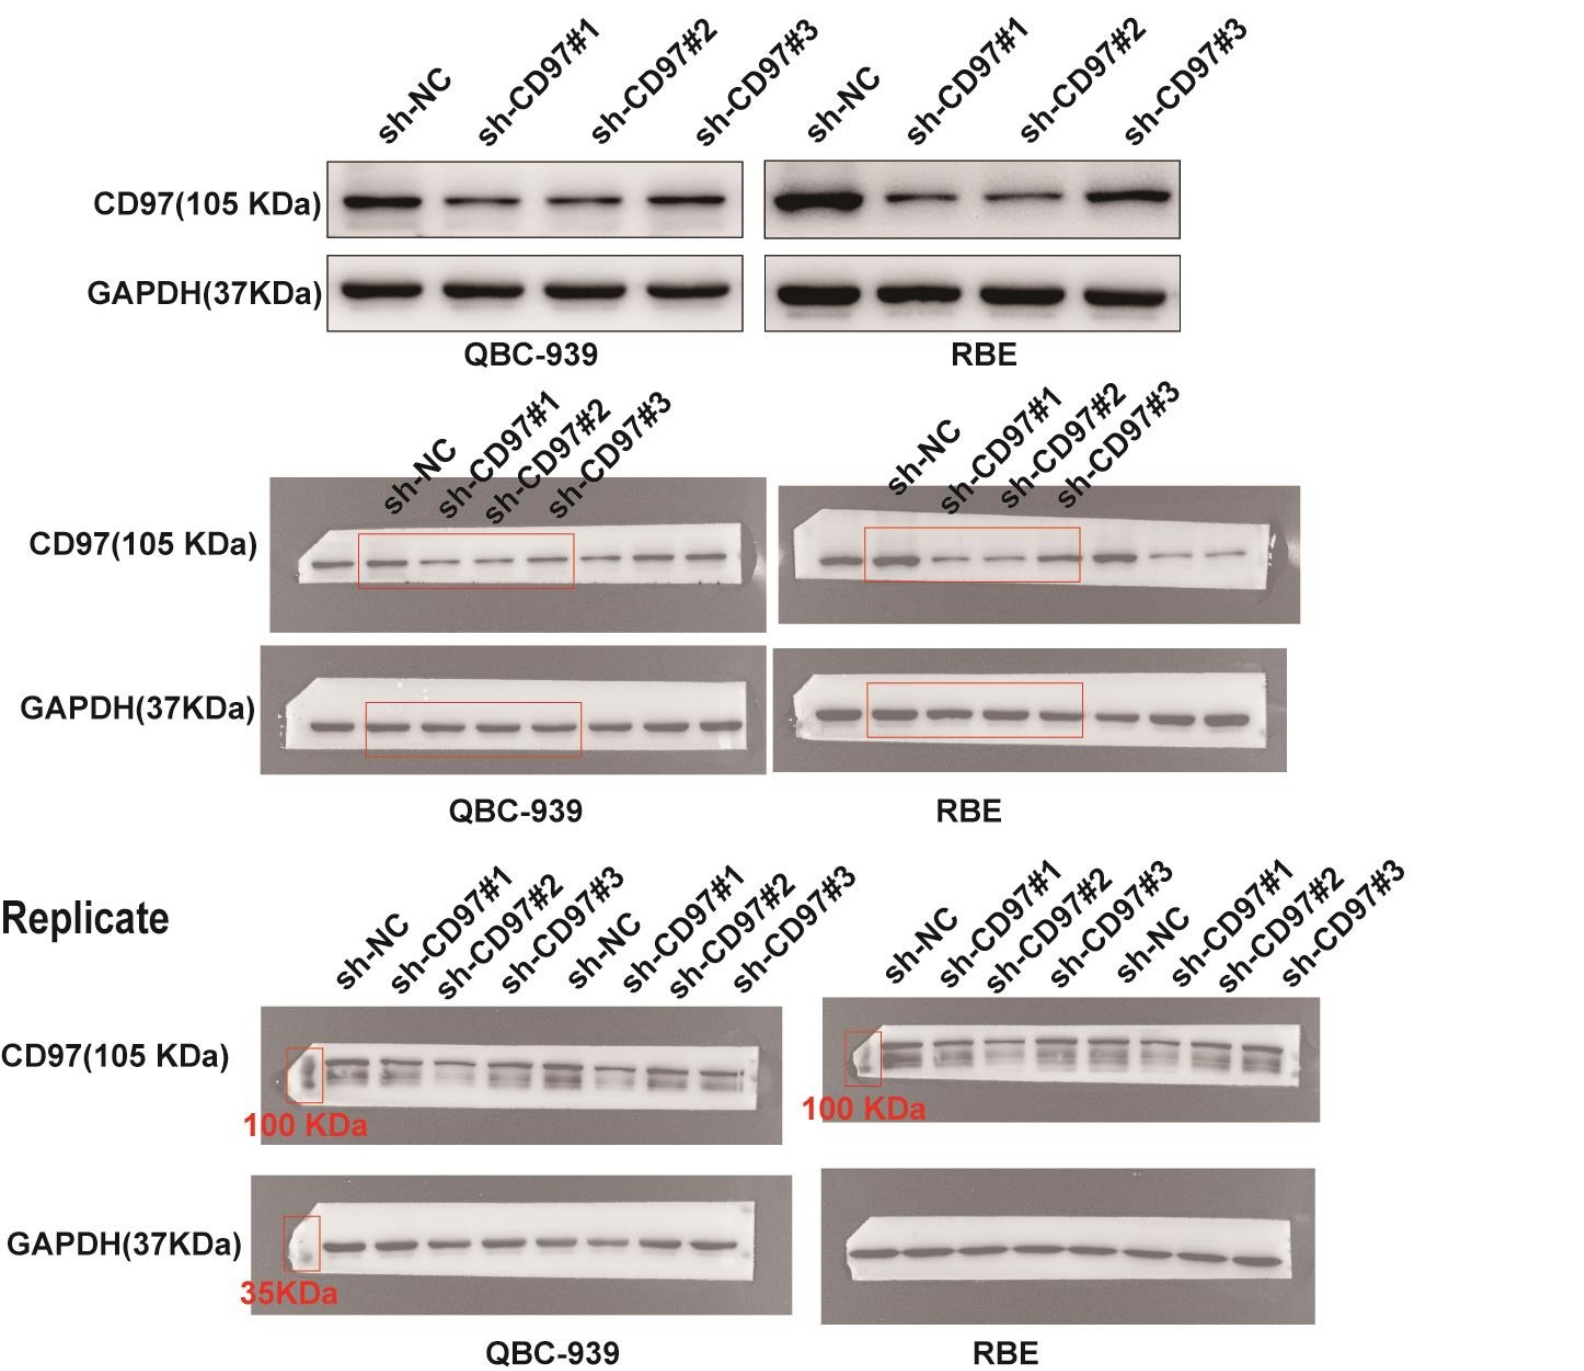

Supplementary Fig.2 The original western blot images and all replicates were provided in merge mode for Supplementary Fig.1A.

supplementary Fig 3

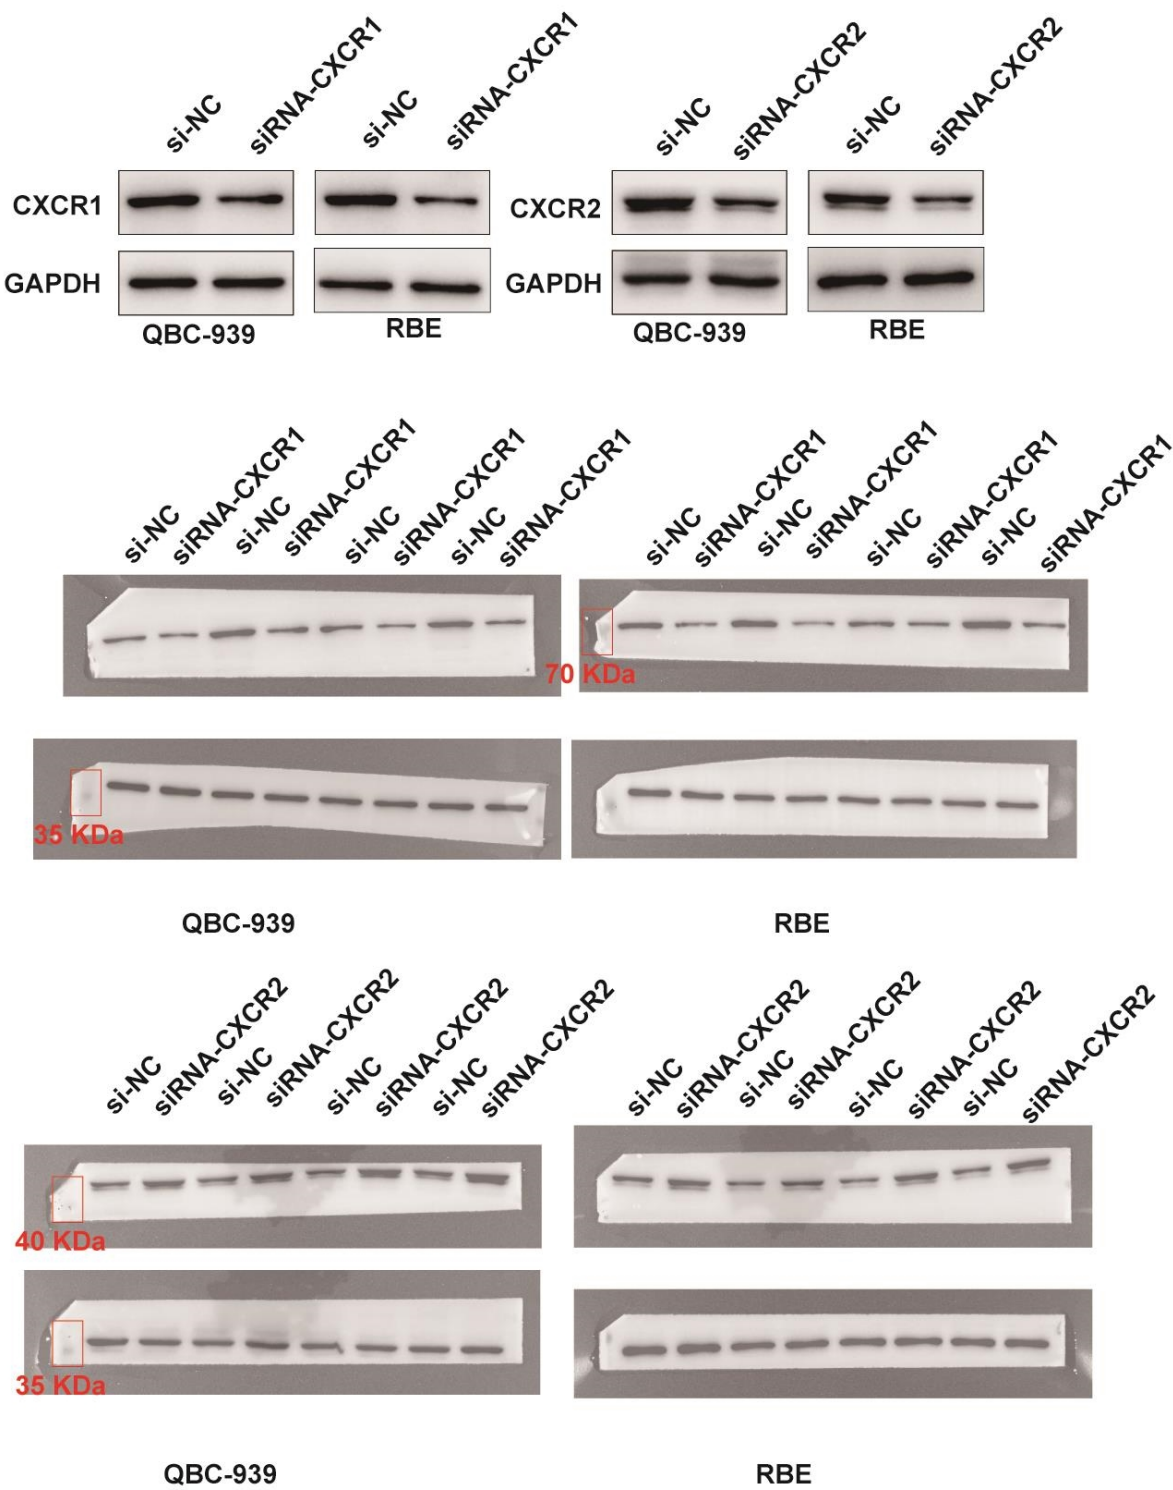

Supplementary Fig.3 The original western blot images and all replicates were provided in merge mode for Supplementary Fig.1D.



Supplementary Fig 4

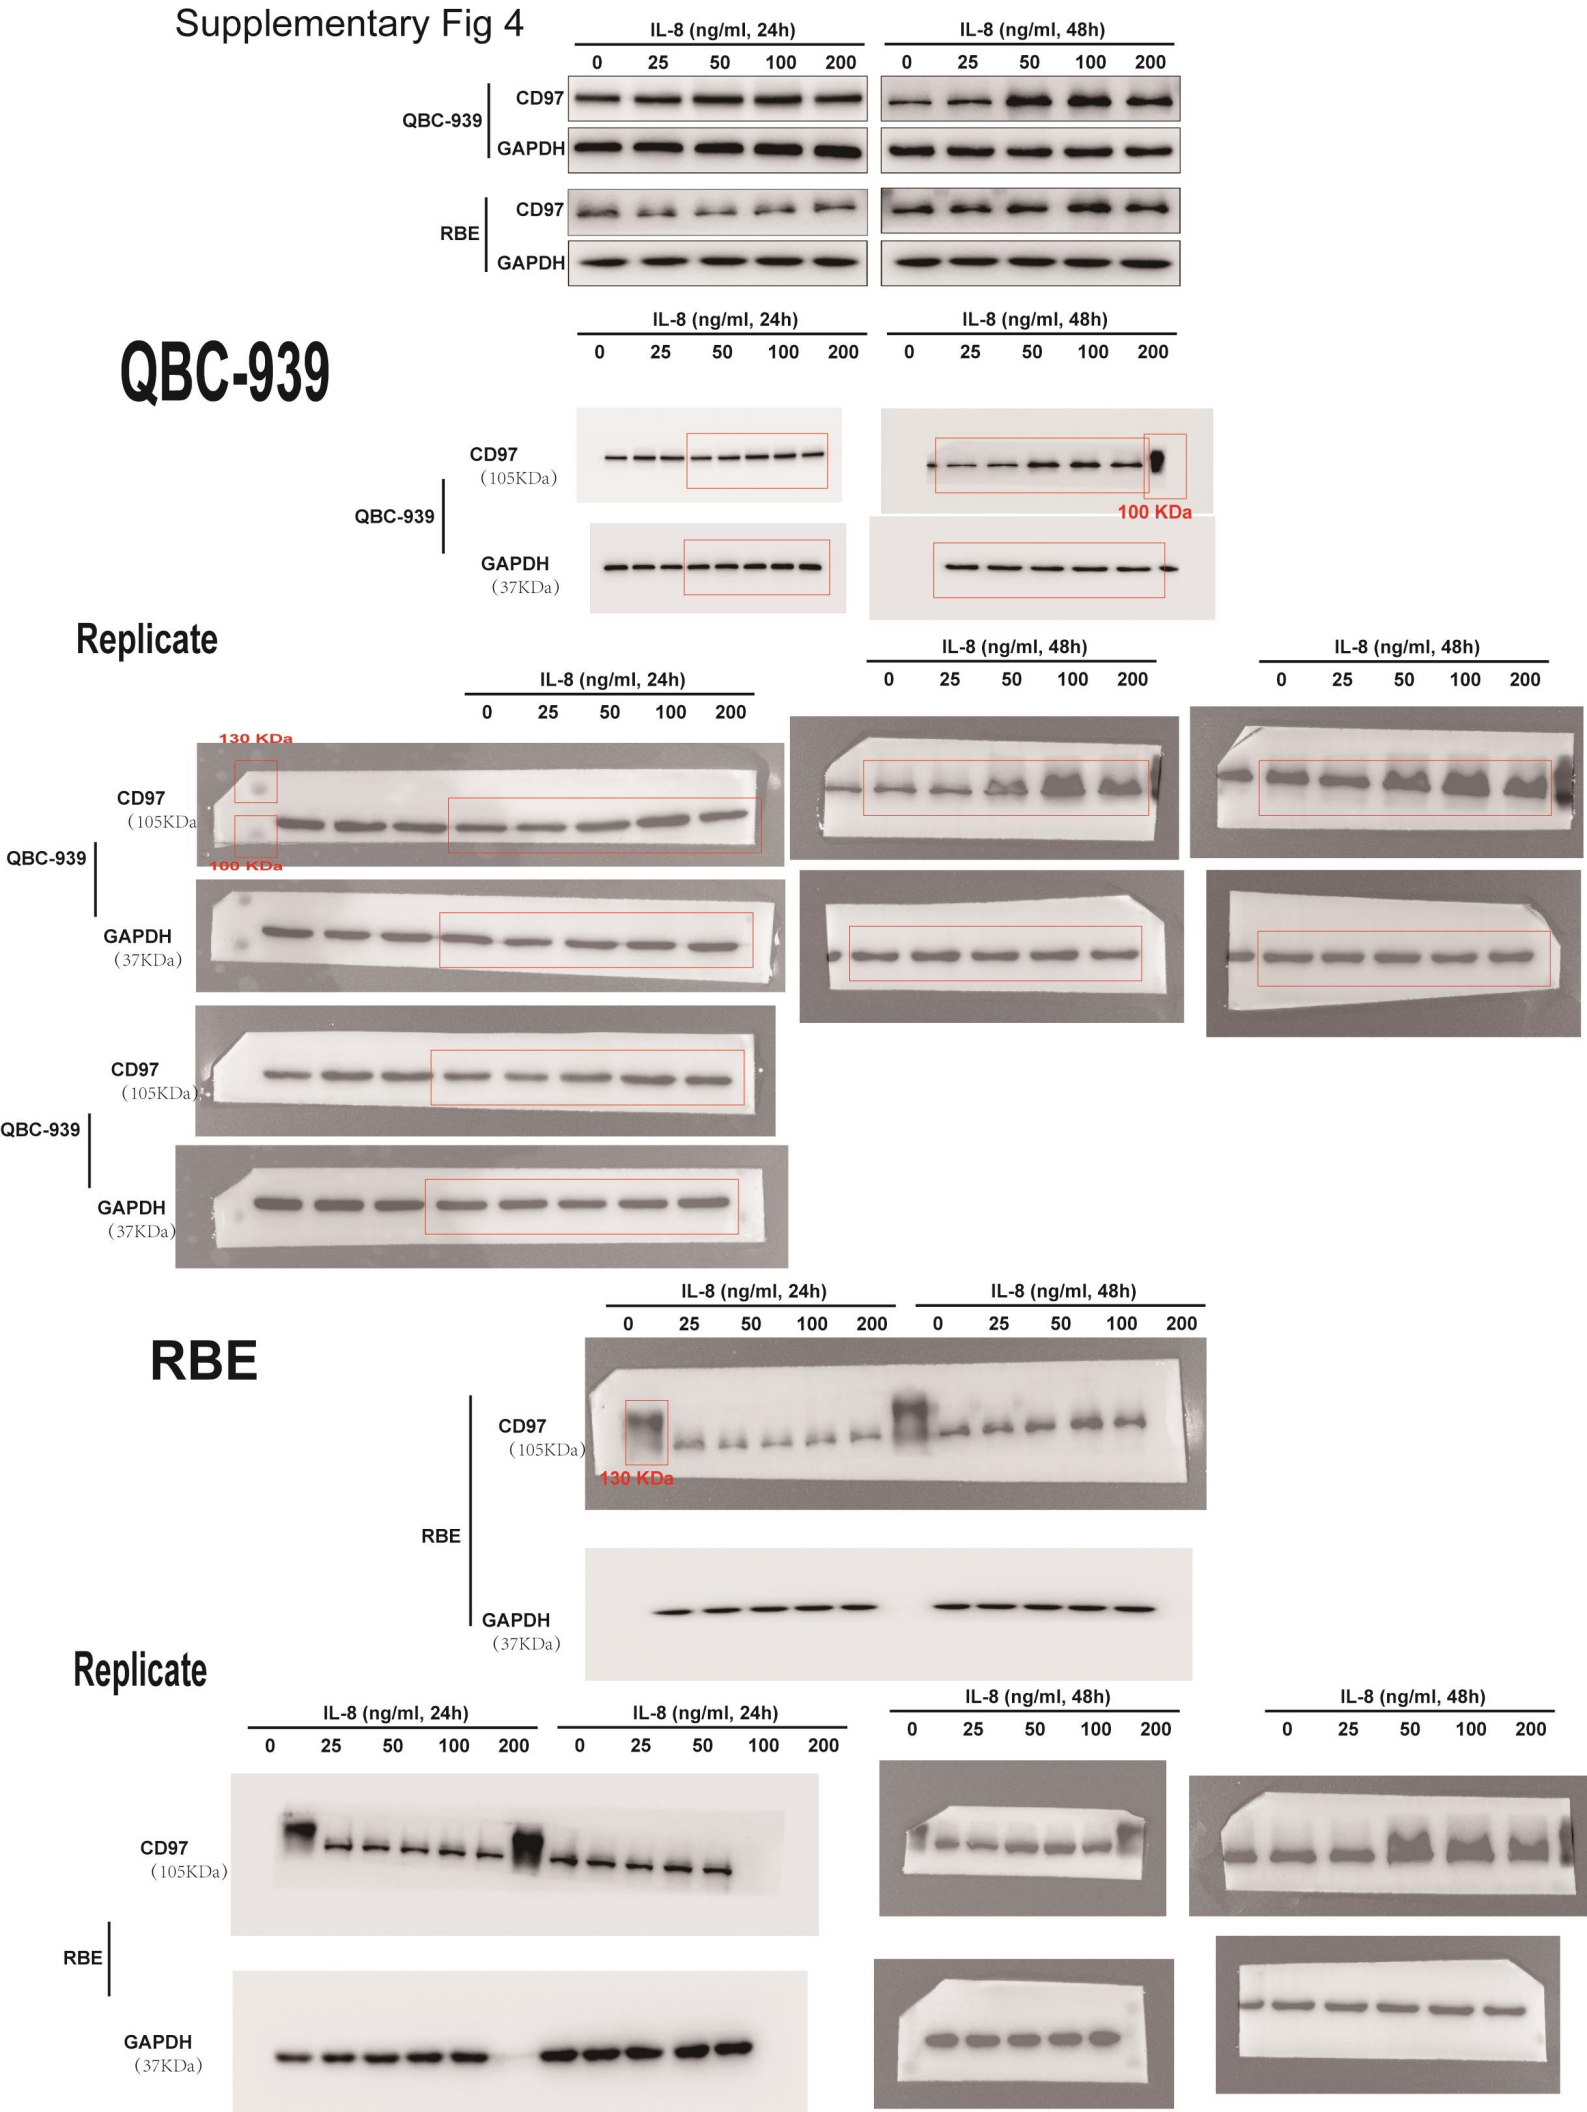

Supplementary Fig.4 The original western blot images and all replicates were provided in merge mode for Fig.1F.

## Supplementary Fig 5

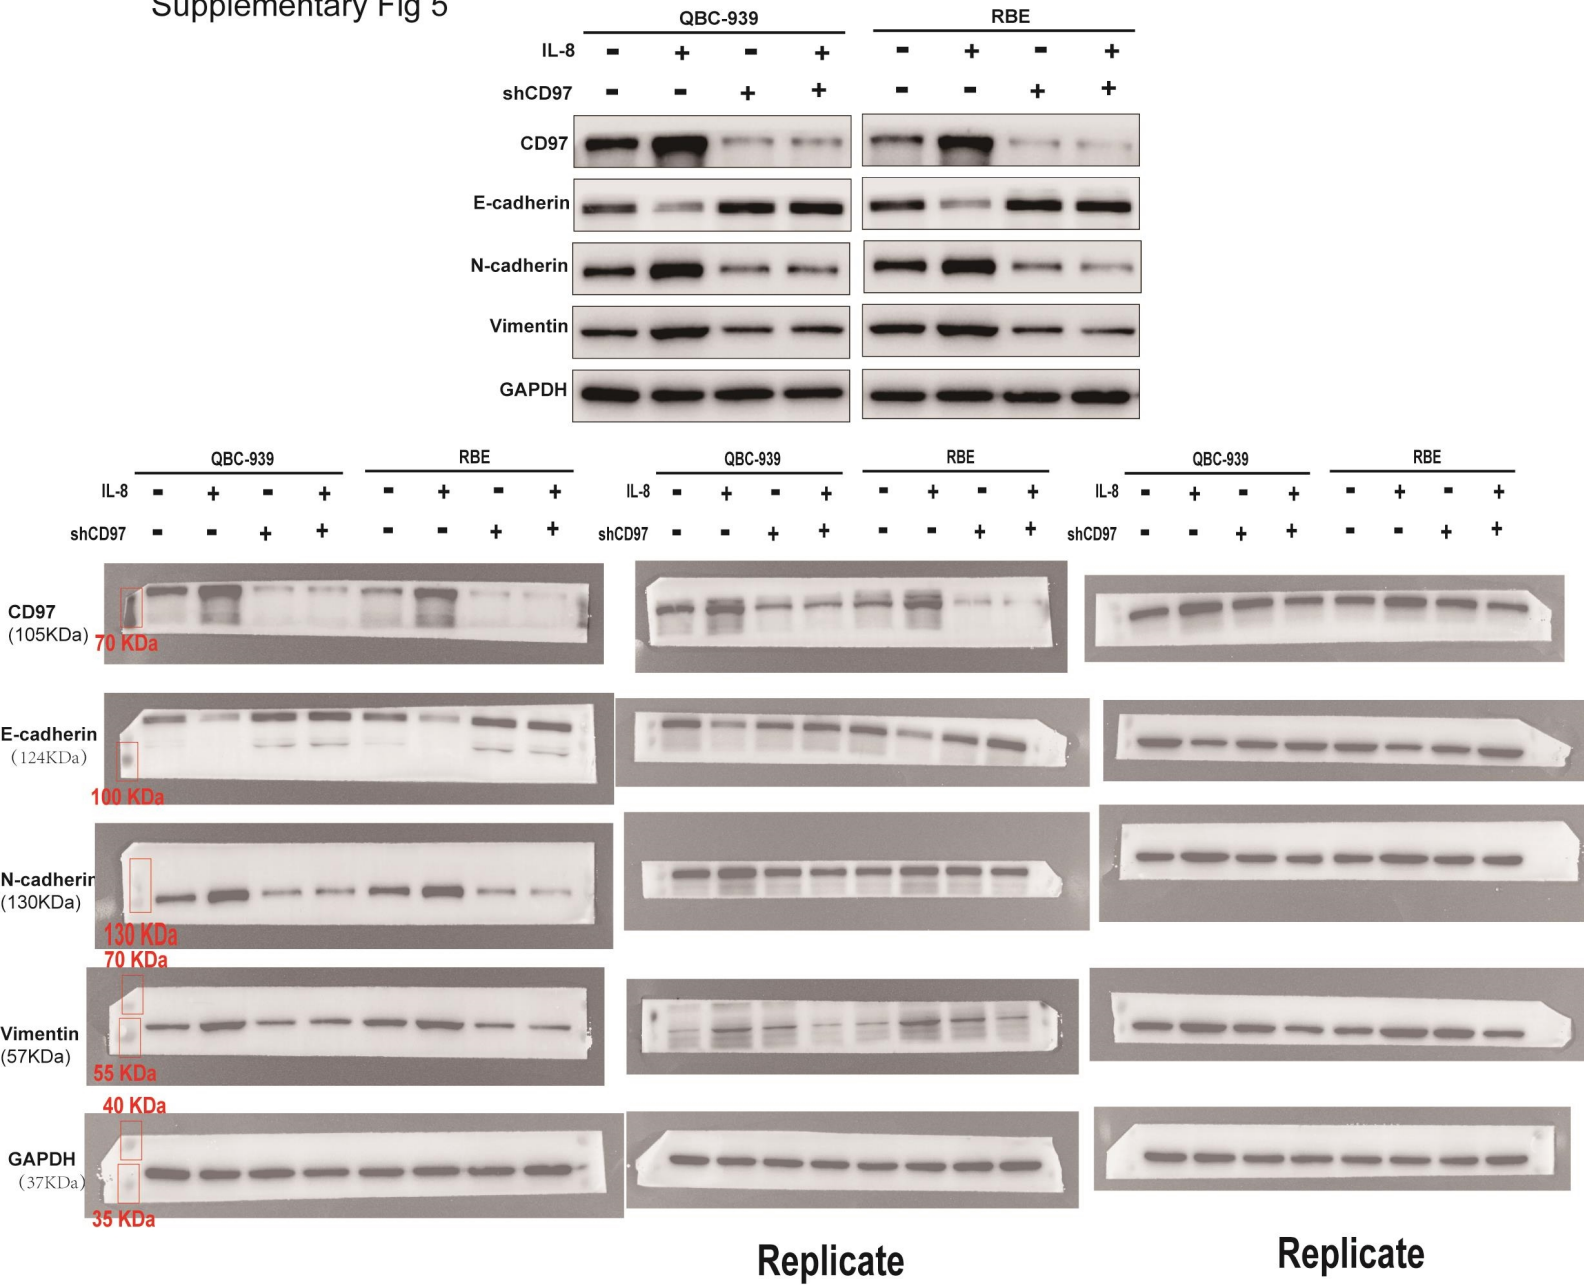

Supplementary Fig.5 The original western blot images and all replicates were provided in merge mode for Fig.2E.

Supplementary Fig 6

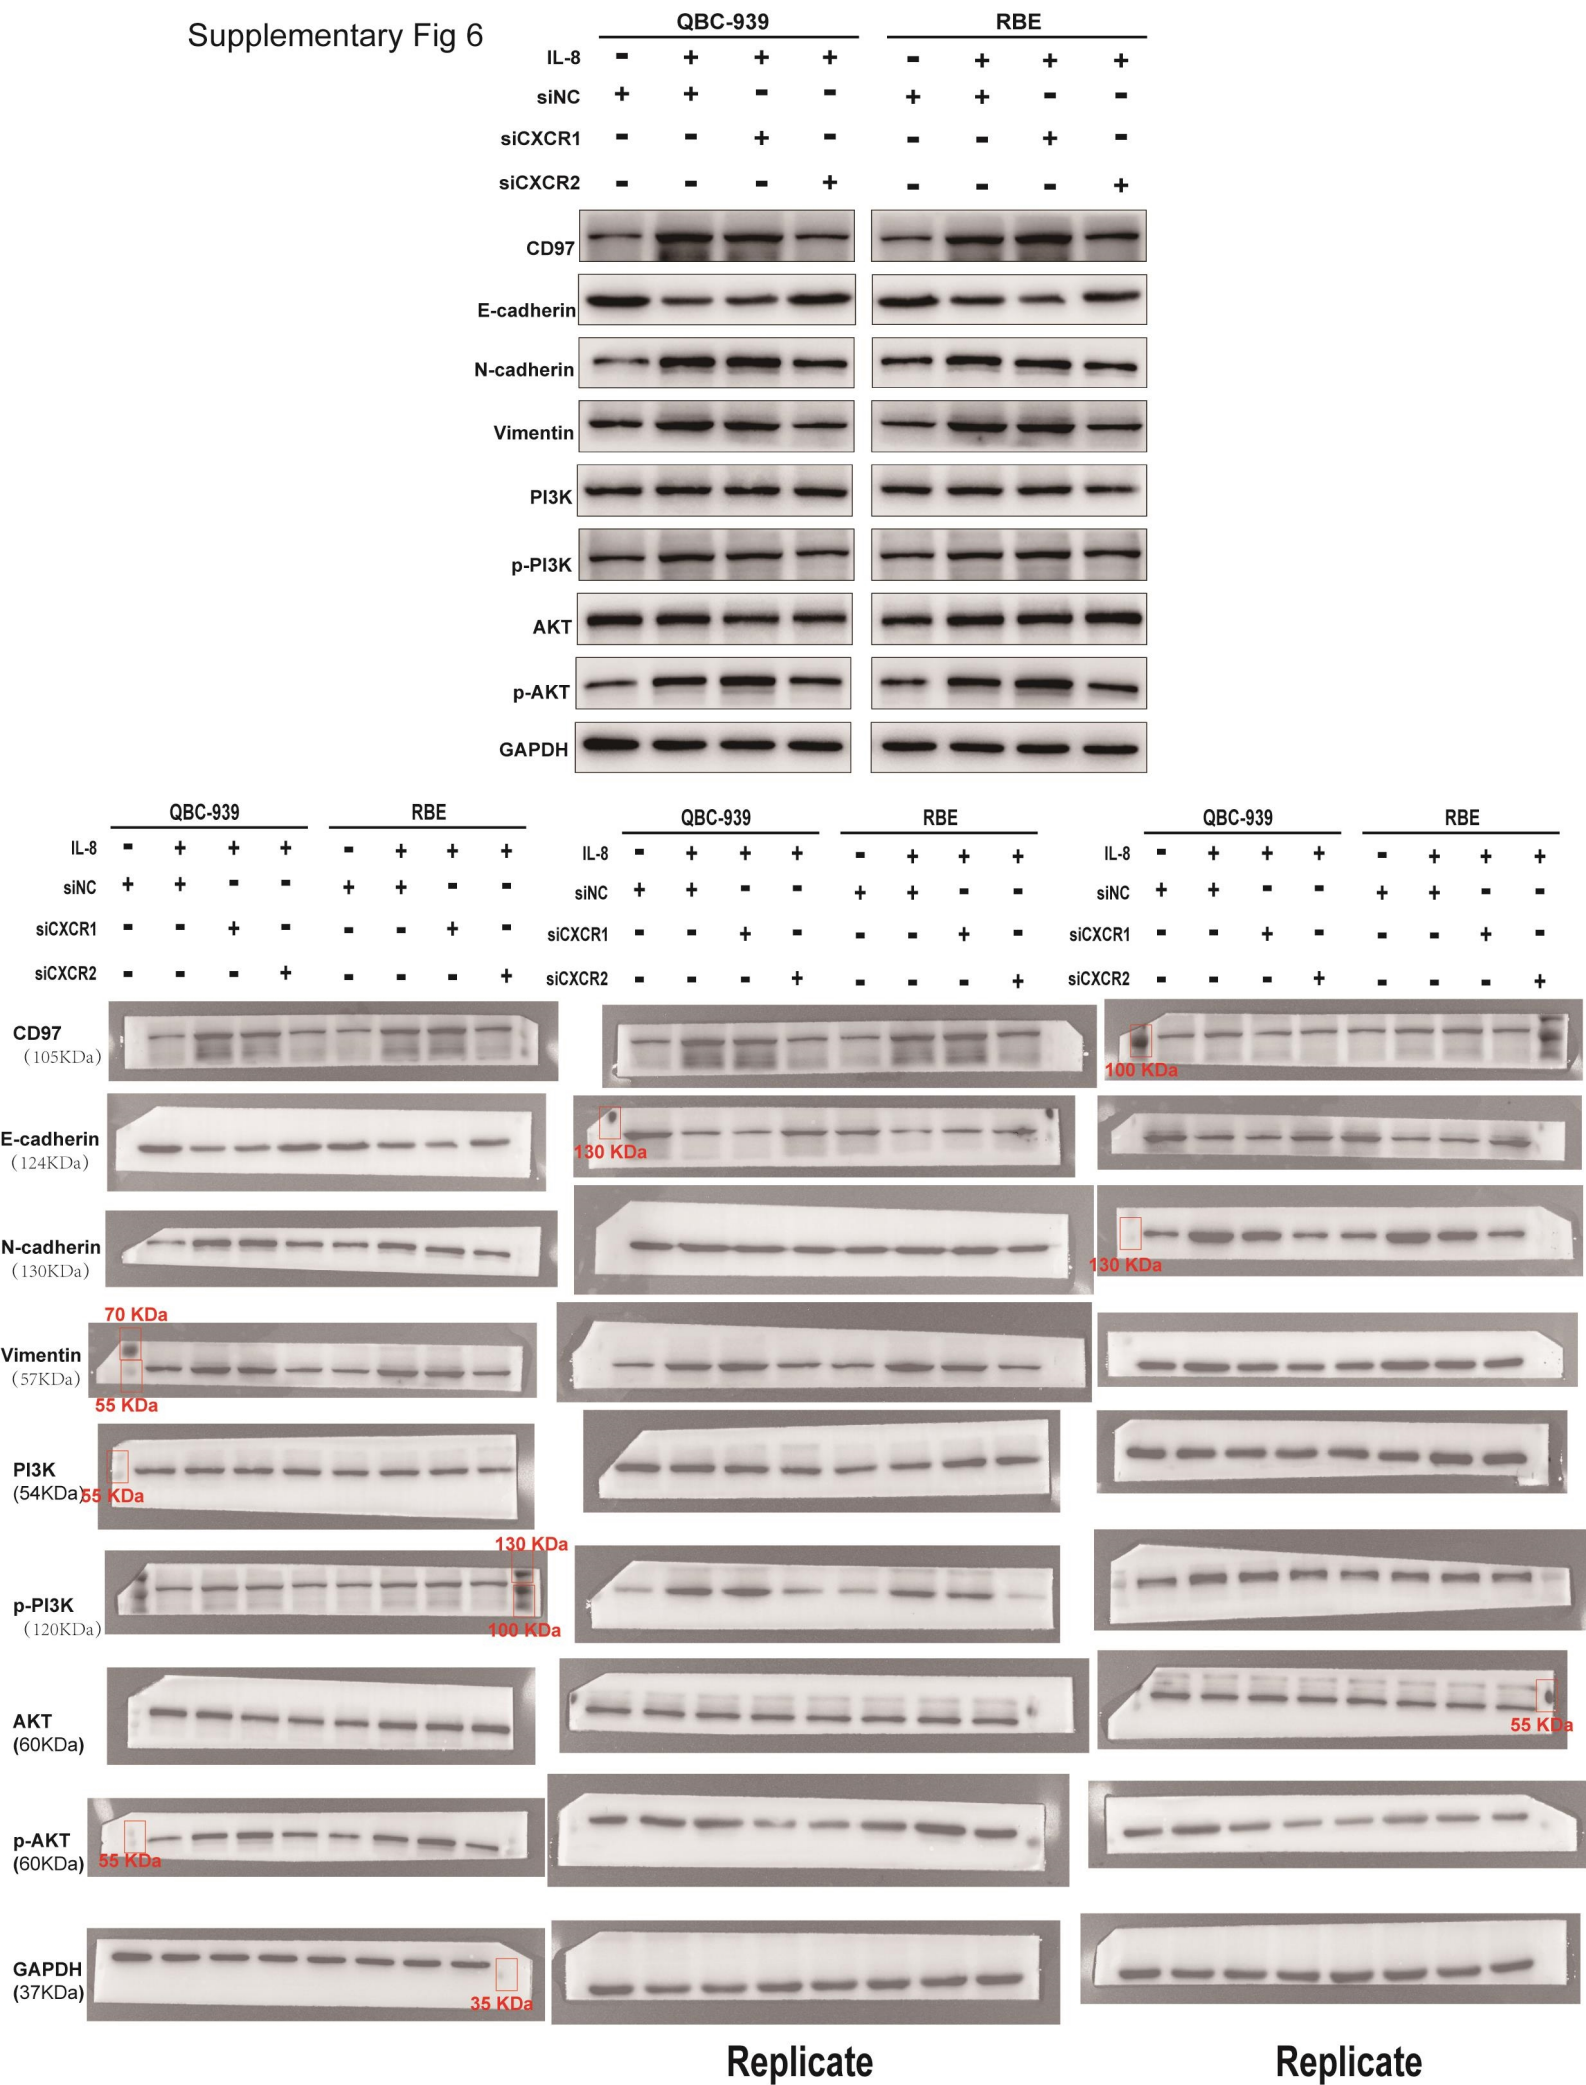

Supplementary Fig.6 The original western blot images and all replicates were provided in merge mode for Fig.3E.



|            | QBC-939 |   |   | RBE |   |   |
|------------|---------|---|---|-----|---|---|
| IL-8       | -       | + | + | -   | + | + |
| LY294002   | -       | - | + | -   | - | + |
| CD97       |         |   |   |     |   |   |
| E-cadherin |         |   |   |     |   |   |
| N-cadherin |         |   |   |     |   |   |
| Vimentin   |         |   |   |     |   |   |
| GAPDH      |         |   |   |     |   |   |

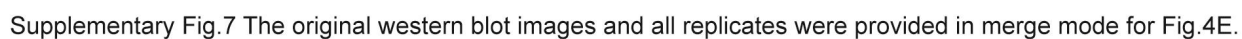

Supplementary Fig.7 The original western blot images and all replicates were provided in merge mode for Fig.4E.
